# Supplementary material for: A Longitudinal Study of Chronic Periodontitis in Two Cohorts of Community-Dwelling Elderly Australians
Source: MDPI journal article supplement (doi:10.3390/ijerph191811824), 2022-09-19
Supplement: s1 [file s1]

## Supplemental tables

**Table S1:** Baseline characteristics of dentate Australian older adults who were examined at 2 years compared with those who were lost to follow-up.

|                                           | <b>SADLS I</b>    |                            |               | <b>SADLS II</b>   |                            |               |
|-------------------------------------------|-------------------|----------------------------|---------------|-------------------|----------------------------|---------------|
|                                           | Examined<br>N (%) | Lost to follow-up<br>N (%) | P-value       | Examined<br>N (%) | Lost to follow-up<br>N (%) | P-value       |
| <b>Total</b>                              | 567               | 234                        |               | 201               | 154                        |               |
| <b>Sample demographic characteristics</b> |                   |                            |               |                   |                            |               |
| <b>Age groups</b>                         |                   |                            | <b>0.0163</b> |                   |                            | 0.3364        |
| 60-64                                     | 157 (27.7)        | 49 (20.9)                  |               | 54 (27.4)         | 53 (29.4)                  |               |
| 65-69                                     | 153 (27.0)        | 58 (24.8)                  |               | 65 (33.0)         | 54 (30.0)                  |               |
| 70-74                                     | 94 (16.5)         | 39 (16.7)                  |               | 41 (20.8)         | 26 (14.4)                  |               |
| 75-79                                     | 101 (17.8)        | 47 (20.1)                  |               | 21 (10.7)         | 25 (13.9)                  |               |
| 80-84                                     | 49 (8.6)          | 25 (10.7)                  |               | 12 (6.1)          | 19 (10.6)                  |               |
| ≥ 85                                      | 13 (2.3)          | 16 (6.8)                   |               | 4 (2.0)           | 3 (1.7)                    |               |
| <b>Sex</b>                                |                   |                            | 0.8825        |                   |                            | 0.1685        |
| Female                                    | 227 (40.0)        | 95 (40.6)                  |               | 91 (46.0)         | 96 (53.0)                  |               |
| Male                                      | 340 (60.0)        | 139 (59.4)                 |               | 107 (54.0)        | 85 (47.0)                  |               |
| <b>Married status</b>                     |                   |                            | 0.1895        |                   |                            | 0.9734        |
| Married/ De-facto                         | 420 (74.1)        | 162 (69.5)                 |               | 148 (75.1)        | 137 (75.3)                 |               |
| Single                                    | 147 (25.9)        | 71 (30.5)                  |               | 49 (24.9)         | 45 (24.7)                  |               |
| <b>Born in Australia</b>                  |                   |                            | 0.9063        |                   |                            | <b>0.0108</b> |
| Yes                                       | 387 (68.4)        | 159 (68.0)                 |               | 143 (74.5)        | 110 (62.2)                 |               |
| No                                        | 179 (31.6)        | 75 (32.1)                  |               | 49 (25.5)         | 67 (37.9)                  |               |
| <b>Education level</b>                    |                   |                            | 0.5394        |                   |                            | 0.3048        |
| Tertiary                                  | 193 (34.1)        | 81 (34.6)                  |               | 36 (18.3)         | 39 (21.4)                  |               |
| Trade/ diploma degree                     | 113 (20.0)        | 39 (16.7)                  |               | 61 (31.0)         | 65 (35.7)                  |               |
| Secondary                                 | 260 (45.9)        | 114 (48.7)                 |               | 100 (50.8)        | 78 (42.9)                  |               |
| <b>Household income</b>                   |                   |                            | 0.0516        |                   |                            | 0.6866        |
| High                                      | 222 (41.4)        | 70 (32.3)                  |               | 64 (37.4)         | 63 (41.7)                  |               |
| Medium                                    | 177 (33.0)        | 78 (35.9)                  |               | 49 (28.7)         | 38 (25.2)                  |               |
| Low                                       | 137 (25.6)        | 69 (31.8)                  |               | 58 (33.9)         | 50 (33.1)                  |               |
| <b>Oral health related behaviours</b>     |                   |                            |               |                   |                            |               |
| <b>Dental insured</b>                     |                   |                            | 0.1241        |                   |                            | 0.2388        |
| Had                                       | 244 (43.4)        | 87 (37.5)                  |               | 126 (63.3)        | 127 (69.0)                 |               |
| No                                        | 318 (56.6)        | 145 (62.5)                 |               | 73 (36.7)         | 57 (31.0)                  |               |
| <b>Smoke status</b>                       |                   |                            | 0.9340        |                   |                            | 0.6995        |
| Never smoked                              | 252 (44.9)        | 108 (46.4)                 |               | 116 (59.2)        | 99 (55.9)                  |               |
| Used smoker                               | 245 (43.7)        | 99 (42.5)                  |               | 72 (36.7)         | 68 (38.4)                  |               |
| Current smoker                            | 64 (11.4)         | 26 (11.2)                  |               | 8 (4.1)           | 10 (5.7)                   |               |
| <b>Alcohol drinking</b>                   |                   |                            | 0.1734        |                   |                            | 0.4677        |
| No                                        | 136 (24.0)        | 67 (28.6)                  |               | 36 (18.3)         | 28 (15.5)                  |               |
| Yes                                       | 430 (76.0)        | 167 (71.4)                 |               | 161 (81.7)        | 153 (84.5)                 |               |
| <b>Dental Behaviours</b>                  |                   |                            |               |                   |                            |               |
| <b>Oral hygiene (Tooth brushing)</b>      |                   |                            | 0.0548        |                   |                            | 0.9733        |
| At least twice/day                        | 361 (63.7)        | 132 (56.4)                 |               | 138 (69.4)        | 128 (69.2)                 |               |
| Less than twice/day                       | 206 (36.3)        | 102 (36.3)                 |               | 61 (30.7)         | 57 (30.8)                  |               |
| <b>Last dental visiting</b>               |                   |                            | <b>0.0070</b> |                   |                            | 0.4921        |
| Less than 12 months                       | 360 (63.7)        | 124 (53.5)                 |               | 139 (70.2)        | 135 (73.4)                 |               |
| More than 12 months                       | 205 (36.3)        | 108 (46.6)                 |               | 59 (29.8)         | 49 (26.6)                  |               |
| <b>Reasons for dental visiting</b>        |                   |                            | <b>0.0065</b> |                   |                            | 0.2839        |
| Check                                     | 252 (44.7)        | 79 (34.2)                  |               | 89 (46.1)         | 94 (51.7)                  |               |
| Problem                                   | 312 (55.3)        | 152 (65.8)                 |               | 104 (53.9)        | 88 (48.4)                  |               |

**Note:** P-value: Chi-square test (or Fisher's exact test for cell values less than 5).

**Table S2:** Baseline general health condition of dentate Australian older adults who were examined at 2 years compared with those who were lost to follow-up.

|                                        | <b>SADLS I</b> |                   |         | <b>SADLS II</b> |                   |         |
|----------------------------------------|----------------|-------------------|---------|-----------------|-------------------|---------|
|                                        | Examined       | Lost to follow-up | P-value | Examined        | Lost to follow-up | P-value |
| <b>Total</b>                           |                |                   |         |                 |                   |         |
| <b>General health</b>                  |                |                   |         |                 |                   |         |
| <b>Asthma</b>                          |                |                   | 0.7296  |                 |                   | 0.2185  |
| No                                     | 525 (92.6)     | 215 (91.9)        |         | 165 (86.8)      | 143 (82.2)        |         |
| Yes                                    | 42 (68.9)      | 19 (8.1)          |         | 25 (13.2)       | 31 (17.8)         |         |
| <b>Arthritis</b>                       |                |                   | 0.5614  |                 |                   | 0.8102  |
| No                                     | 280 (49.5)     | 110 (47.2)        |         | 97 (51.9)       | 85 (50.6)         |         |
| Yes                                    | 286 (50.5)     | 123 (52.8)        |         | 90 (48.1)       | 83 (49.4)         |         |
| <b>Cancer</b>                          |                |                   | 0.2428  |                 |                   | 0.2323  |
| No                                     | 502 (88.9)     | 201 (85.9)        |         | 159 (84.6)      | 138 (79.8)        |         |
| Yes                                    | 63 (11.2)      | 33 (14.1)         |         | 29 (15.4)       | 35 (20.2)         |         |
| <b>Cataracts</b>                       |                |                   | 0.9072  |                 |                   | 0.2187  |
| No                                     | 472 (83.3)     | 194 (82.9)        |         | 147 (80.3)      | 125 (74.9)        |         |
| Yes                                    | 95 (16.8)      | 40 (17.1)         |         | 36 (19.7)       | 42 (25.2)         |         |
| <b>COPD</b>                            |                |                   | 0.0328  |                 |                   | 0.2471  |
| No                                     | 505 (89.2)     | 196 (83.8)        |         | 167 (90.8)      | 158 (94.1)        |         |
| Yes                                    | 61 (10.8)      | 38 (16.2)         |         | 17 (9.2)        | 10 (6.0)          |         |
| <b>Diabetes</b>                        |                |                   | 0.0017  |                 |                   | 0.4244  |
| No                                     | 542 (95.6)     | 210 (89.7)        |         | 161 (85.2)      | 142 (82.1)        |         |
| Yes                                    | 25 (4.4)       | 24 (10.3)         |         | 28 (14.8)       | 31 (17.9)         |         |
| <b>Hypertension</b>                    |                |                   | 0.6984  |                 |                   | 0.3984  |
| No                                     | 365 (64.4)     | 154 (65.8)        |         | 94 (49.5)       | 77 (45.0)         |         |
| Yes                                    | 202 (35.6)     | 80 (34.2)         |         | 96 (50.5)       | 94 (55.0)         |         |
| <b>Heart</b>                           |                |                   | 0.1382  |                 |                   | 0.2560  |
| No                                     | 465 (82.3)     | 182 (77.8)        |         | 170 (91.9)      | 151 (88.3)        |         |
| Yes                                    | 100 (17.7)     | 52 (22.2)         |         | 15 (8.1)        | 20 (11.7)         |         |
| <b>Osteoporosis or hip fracture</b>    |                |                   | 0.1182  |                 |                   | 0.4105  |
| No                                     | 546 (96.5)     | 220 (94.0)        |         | 168 (89.8)      | 148 (87.1)        |         |
| Yes                                    | 20 (3.5)       | 14 (6.0)          |         | 19 (10.2)       | 22 (12.9)         |         |
| <b>Stroke</b>                          |                |                   | 0.3070  |                 |                   | 0.1282  |
| No                                     | 529 (93.5)     | 213 (91.4)        |         | 182 (97.3)      | 159 (94.1)        |         |
| Yes                                    | 37 (64.9)      | 20 (8.6)          |         | 5 (2.7)         | 10 (5.9)          |         |
| <b>Chronic diseases (At least one)</b> |                |                   | 0.0090  |                 |                   | 0.7604  |
| No                                     | 123 (21.7)     | 32 (13.7)         |         | 29 (14.7)       | 29 (15.9)         |         |
| Had                                    | 444 (78.3)     | 202 (86.3)        |         | 168 (85.3)      | 154 (84.2)        |         |
| <b>Number of diseases</b>              |                |                   | 0.0679  |                 |                   | 0.2075  |
| 0                                      | 123 (21.7)     | 32 (13.7)         |         | 29 (14.7)       | 29 (15.9)         |         |
| 1                                      | 163 (28.8)     | 78 (33.3)         |         | 62 (31.5)       | 44 (24.0)         |         |
| 2                                      | 151 (26.6)     | 53 (22.7)         |         | 53 (26.9)       | 47 (25.7)         |         |
| 3                                      | 79 (13.9)      | 39 (16.7)         |         | 30 (15.2)       | 29 (15.9)         |         |
| 4                                      | 34 (6.0)       | 21 (9.0)          |         | 15 (7.6)        | 19 (10.4)         |         |
| 5                                      | 10 (1.8)       | 8 (3.4)           |         | 6 (3.1)         | 14 (7.7)          |         |
| 6                                      | 6 (1.1)        | 3 (1.3)           |         | 2 (1.0)         | 0 (0.0)           |         |
| 7                                      | 1 (0.2)        | 0 (0.0)           |         | 0 (0.0)         | 1 (0.6)           |         |

**Note:** P-value: Chi-square test (or Fisher's exact test for cell values less than 5).

**Table S3:** Prevalence of periodontitis and mean number of tooth loss of Australian adults aged 60+ years in two surveys.

|                                | <b>SADLS I (n=567)</b>  |                   | <b>SADLS II (n=201)</b> |                   |
|--------------------------------|-------------------------|-------------------|-------------------------|-------------------|
|                                | Baseline (1991-92)      | 2 years follow-up | Baseline (2013-14)      | 2 years follow-up |
|                                | N (%)                   | N (%)             | N (%)                   | N (%)             |
| <b>Degree of periodontitis</b> |                         |                   |                         |                   |
| <b>AAP-CDC-case</b>            |                         |                   |                         |                   |
| No/Mild                        | *154 (27.2)             | *226 (39.9)       | *40 (19.9)              | *68 (33.8)        |
| Moderate                       | 342 (60.3)              | 292 (51.5)        | 127 (63.2)              | 119 (59.2)        |
| Severe                         | 71 (12.5)               | 49 (8.6)          | 34 (16.9)               | 14 (7.0)          |
| <b>EFP/AAP case</b>            |                         |                   |                         |                   |
| Stage I                        | *31 (5.5)               | *66 (11.6)        | *6 (3.5)                | *22 (11.0)        |
| Stage II                       | 295 (52.0)              | 313 (55.2)        | 74 (43.5)               | 113 (56.2)        |
| Stage III-IV                   | 241 (42.5)              | 188 (33.2)        | 90 (52.9)               | 66 (32.8)         |
|                                | Mean ( <sup>a</sup> SD) | Mean (SD)         | Mean (SD)               | Mean (SD)         |
| <b>No. of tooth loss</b>       | 12.5 (6.7)              | 12.8 (6.8)        | 6.3 (6.0)               | 6.6 (6.0)         |

Notes: \*Chi-square test, and p-values <0.05; <sup>a</sup> SD: standard deviation.

**Table S4:** Multivariable models of the incidence rate ratios (IRRs) of periodontitis under two case definition in **SADLSI** survey.

|                                           | CDC/AAP                 |                         |                         | EFP/AAP                 |                         |                         |
|-------------------------------------------|-------------------------|-------------------------|-------------------------|-------------------------|-------------------------|-------------------------|
|                                           | Model 1                 | Model 2                 | Model3                  | Model 1                 | Model 2                 | Model3                  |
| <b>Sample demographic characteristics</b> |                         |                         |                         |                         |                         |                         |
| <b>Age groups</b>                         |                         |                         |                         |                         |                         |                         |
| 60-64                                     | ref                     | ref                     | ref                     | ref                     | ref                     | ref                     |
| 65-69                                     | 0.73 (0.44-1.22)        | 0.69 (0.41-1.17)        | 0.68 (0.39-1.16)        | 1.08 (0.64-1.82)        | 1.08 (0.64-1.85)        | 1.09 (0.63-1.88)        |
| 70-74                                     | 0.83 (0.47-1.46)        | 0.82 (0.46-1.47)        | 0.72 (0.41-1.31)        | 1.09 (0.60-1.98)        | 1.00 (0.54-1.87)        | 0.95 (0.51-1.78)        |
| 75-79                                     | 0.83 (0.47-1.44)        | 0.90 (0.51-1.59)        | 0.75 (0.41-1.38)        | 1.14 (0.64-2.03)        | 1.17 (0.64-2.14)        | 1.06 (0.56-2.00)        |
| 80-84                                     | 0.84 (0.41-1.72)        | 0.86 (0.41-1.81)        | 0.74 (0.34-1.59)        | 1.09 (0.52-2.31)        | 1.10 (0.51-2.36)        | 1.02 (0.47-2.23)        |
| ≥ 85                                      | 1.01 (0.38-3.20)        | 1.16 (0.40-3.38)        | 0.87 (0.29-2.65)        | 1.01 (0.30-3.41)        | 1.08 (0.32-3.68)        | 1.00 (0.28-3.54)        |
| <b>Sex</b>                                |                         |                         |                         |                         |                         |                         |
| Female                                    | ref                     | ref                     | ref                     | ref                     | ref                     | ref                     |
| Male                                      | <b>1.81 (1.16-2.84)</b> | 1.38 (0.84-2.29)        | 1.25 (0.75-2.10)        | <b>1.51 (1.00-2.35)</b> | 1.31 (0.79-2.19)        | 1.26 (0.75-2.12)        |
| <b>Married status</b>                     |                         |                         |                         |                         |                         |                         |
| Married/ De-facto                         | ref                     | ref                     | ref                     | ref                     | ref                     | ref                     |
| Single                                    | 1.00 (0.58-1.72)        | 0.94 (0.54-1.62)        | 1.00 (0.57-1.74)        | 1.13 (0.66-1.91)        | 1.08 (0.63-1.86)        | 1.13 (0.65-1.95)        |
| <b>Born in Australia</b>                  |                         |                         |                         |                         |                         |                         |
| Yes                                       | ref                     | ref                     | ref                     | ref                     | ref                     | ref                     |
| No                                        | 1.29 (0.88-1.90)        | 1.32 (0.90-1.96)        | 1.41 (0.94-2.12)        | 1.32 (0.89-1.95)        | 1.29 (0.86-1.93)        | 1.31 (0.87-1.98)        |
| <b>Education level</b>                    |                         |                         |                         |                         |                         |                         |
| Tertiary                                  | ref                     | ref                     | ref                     | ref                     | ref                     | ref                     |
| Trade/ diploma degree                     | 0.80 (0.47-1.37)        | 0.79 (0.46-1.37)        | 0.85 (0.49-1.49)        | 0.64 (0.35-1.15)        | 0.62 (0.34-1.14)        | 0.68 (0.37-1.25)        |
| Secondary                                 | 0.82 (0.54-1.27)        | 0.87 (0.55-1.35)        | 0.88 (0.55-1.38)        | 0.90 (0.59-1.39)        | 0.96 (0.61-1.50)        | 0.92 (0.58-1.47)        |
| <b>Household income</b>                   |                         |                         |                         |                         |                         |                         |
| High                                      | ref                     | ref                     | ref                     | ref                     | ref                     | ref                     |
| Medium                                    | 1.31 (0.85-2.02)        | 1.34 (0.83-2.17)        | 1.32 (0.81-2.15)        | 1.20 (0.77-1.88)        | 1.17 (0.71-1.93)        | 1.21 (0.73-2.01)        |
| Low                                       | 1.13 (0.65-1.94)        | 1.19 (0.66-2.14)        | 1.04 (0.57-1.92)        | 1.07 (0.62-1.84)        | 1.05 (0.58-1.91)        | 0.99 (0.53-1.83)        |
| <b>Oral health and related behaviours</b> |                         |                         |                         |                         |                         |                         |
| <b>Dental insured</b>                     |                         |                         |                         |                         |                         |                         |
| Had                                       |                         | ref                     | ref                     |                         | ref                     | ref                     |
| No                                        |                         | 0.99 (0.63-1.56)        | 1.06 (0.67-1.68)        |                         | 1.10 (0.69-1.76)        | 1.14 (0.71-1.82)        |
| <b>Smoke status</b>                       |                         |                         |                         |                         |                         |                         |
| Never smoked                              |                         | ref                     | ref                     |                         | ref                     | ref                     |
| Used smoker                               |                         | 1.52 (0.95-2.44)        | 1.59 (0.98-2.58)        |                         | 1.38 (0.86-2.21)        | 1.56 (0.92-2.45)        |
| Current smoker                            |                         | <b>2.32 (1.29-4.18)</b> | <b>2.38 (1.30-4.35)</b> |                         | <b>2.10 (1.15-3.85)</b> | <b>2.30 (1.24-4.26)</b> |
| <b>Alcohol drinking</b>                   |                         |                         |                         |                         |                         |                         |
| No                                        |                         | ref                     | ref                     |                         | ref                     | ref                     |
| Yes                                       |                         | 1.20 (0.72-2.01)        | 1.26 (0.75-2.14)        |                         | 0.93 (0.57-1.52)        | 0.90 (0.54-1.50)        |
| <b>Oral hygiene (Tooth brushing)</b>      |                         |                         |                         |                         |                         |                         |
| At least twice/day                        |                         | ref                     | ref                     |                         | ref                     | ref                     |

|                                     |                  |                  |                  |                  |
|-------------------------------------|------------------|------------------|------------------|------------------|
| Less than twice/day                 | 0.97 (0.65-1.44) | 0.96 (0.63-1.46) | 0.97 (0.64-1.46) | 0.95 (0.62-1.46) |
| <b>Last dental visiting</b>         |                  |                  |                  |                  |
| Less than 12 months                 | ref              | ref              | ref              | ref              |
| More than 12 months                 | 0.81 (0.50-1.30) | 0.71 (0.43-1.16) | 0.71 (0.44-1.16) | 0.69 (0.42-1.14) |
| <b>Reasons for dental visiting</b>  |                  |                  |                  |                  |
| Check                               | ref              | ref              | ref              | ref              |
| Problem                             | 1.05 (0.66-1.67) | 1.15 (0.71-1.83) | 1.13 (0.70-1.80) | 1.13 (0.70-1.83) |
| <b>General health</b>               |                  |                  |                  |                  |
| <b>Asthma</b>                       |                  |                  |                  |                  |
| No                                  |                  | ref              |                  | ref              |
| Yes                                 |                  | 1.39 (0.73-2.66) |                  | 1.28 (0.65-2.52) |
| <b>Arthritis</b>                    |                  |                  |                  |                  |
| No                                  |                  | ref              |                  | ref              |
| Yes                                 |                  | 1.10 (0.74-2.31) |                  | 1.28 (0.85-1.95) |
| <b>Cancer</b>                       |                  |                  |                  |                  |
| No                                  |                  | ref              |                  | ref              |
| Yes                                 |                  | 1.30 (0.73-2.31) |                  | 1.38 (0.77-2.44) |
| <b>Cataracts</b>                    |                  |                  |                  |                  |
| No                                  |                  | ref              |                  | ref              |
| Yes                                 |                  | 1.37 (0.83-2.28) |                  | 0.87 (0.49-1.55) |
| <b>COPD</b>                         |                  |                  |                  |                  |
| No                                  |                  | ref              |                  | ref              |
| Yes                                 |                  | 0.66 (0.33-1.32) |                  | 0.92 (0.47-1.78) |
| <b>Diabetes</b>                     |                  |                  |                  |                  |
| No                                  |                  | ref              |                  | ref              |
| Yes                                 |                  | 1.56 (0.69-3.51) |                  | 0.96 (0.34-2.72) |
| <b>Hypertension</b>                 |                  |                  |                  |                  |
| No                                  |                  | ref              |                  | ref              |
| Yes                                 |                  | 0.95 (0.61-3.51) |                  | 0.89 (0.57-1.41) |
| <b>Heart</b>                        |                  |                  |                  |                  |
| No                                  |                  | ref              |                  | ref              |
| Yes                                 |                  | 1.11 (0.68-1.79) |                  | 1.18 (0.71-1.96) |
| <b>Osteoporosis or hip fracture</b> |                  |                  |                  |                  |
| No                                  |                  | ref              |                  | ref              |
| Yes                                 |                  | 0.29 (0.03-2.11) |                  | 0.29 (0.04-2.12) |
| <b>Stroke</b>                       |                  |                  |                  |                  |
| No                                  |                  | ref              |                  | ref              |
| Yes                                 |                  | 1.38 (0.69-2.73) |                  | 0.88 (0.39-2.00) |

Note: Bold used for the statistically significant.

**Table S5:** Multivariable models of the incidence rate ratios (IRRs) of periodontitis under two case definition in **SADLSII** survey.

|                                           | CDC/AAP          |                  |                         | EFP/AAP          |                  |                  |
|-------------------------------------------|------------------|------------------|-------------------------|------------------|------------------|------------------|
|                                           | Model 1          | Model 2          | Model3                  | Model 1          | Model 2          | Model3           |
| <b>Sample demographic characteristics</b> |                  |                  |                         |                  |                  |                  |
| <b>Age groups</b>                         |                  |                  |                         |                  |                  |                  |
| 60-64                                     | ref              | ref              | ref                     | ref              | ref              | ref              |
| 65-69                                     | 1.00 (0.56-1.80) | 1.06 (0.69-1.64) | 1.02 (0.48-2.17)        | 1.18 (0.62-2.22) | 1.09 (0.69-1.72) | 1.27 (0.55-2.96) |
| 70-74                                     | 0.51 (0.22-1.16) | 0.61 (0.33-1.14) | <b>0.29 (0.09-0.98)</b> | 0.73 (0.32-1.67) | 0.80 (0.45-1.41) | 0.48 (0.15-1.58) |
| 75-79                                     | 1.16 (0.51-2.63) | 1.34 (0.68-2.63) | 1.30 (0.43-3.90)        | 1.64 (0.72-3.73) | 1.48 (0.76-2.87) | 2.23 (0.71-6.34) |
| 80-84                                     | 0.91 (0.30-2.76) | 0.86 (0.35-2.11) | 0.73 (0.18-2.92)        | 1.13 (0.37-3.52) | 0.86 (0.37-1.98) | 0.78 (0.18-3.39) |
| ≥ 85                                      | 0.62 (0.08-4.82) | 0.75 (0.19-2.97) | 0.72 (0.08-6.53)        | 0.74 (0.09-5.85) | 0.90 (0.24-3.35) | 0.76 (0.08-7.55) |
| <b>Sex</b>                                |                  |                  |                         |                  |                  |                  |
| Female                                    | ref              | ref              | ref                     | ref              | ref              | ref              |
| Male                                      | 0.78 (0.48-1.29) | 0.92 (0.60-1.41) | 0.96 (0.50-1.86)        | 0.76 (0.45-1.27) | 0.87 (0.58-1.31) | 0.67 (0.33-1.34) |
| <b>Married status</b>                     |                  |                  |                         |                  |                  |                  |
| Married/ De-facto                         | ref              | ref              | ref                     | ref              | ref              | ref              |
| Single                                    | 0.79 (0.44-1.45) | 0.77 (0.47-1.27) | 0.67 (0.29-1.51)        | 0.96 (0.53-1.73) | 0.95 (0.61-1.50) | 0.78 (0.34-1.78) |
| <b>Born in Australia</b>                  |                  |                  |                         |                  |                  |                  |
| Yes                                       | ref              | ref              | ref                     | ref              | ref              | ref              |
| No                                        | 0.94 (0.54-1.66) | 0.88 (0.55-1.41) | 0.78 (0.35-1.76)        | 1.01 (0.57-1.79) | 1.04 (0.67-1.61) | 0.81 (0.35-1.90) |
| <b>Education level</b>                    |                  |                  |                         |                  |                  |                  |
| Tertiary                                  | ref              | ref              | ref                     | ref              | ref              | ref              |
| Trade/ diploma degree                     | 0.74 (0.38-1.42) | 0.68 (0.37-1.25) | 0.61 (0.27-1.38)        | 0.76 (0.39-1.46) | 0.71 (0.41-1.26) | 0.69 (0.30-1.58) |
| Secondary                                 | 0.68 (0.36-1.32) | 0.71 (0.38-1.30) | 0.67 (0.30-1.49)        | 0.54 (0.28-1.07) | 0.59 (0.32-1.08) | 0.48 (0.20-1.14) |
| <b>Household income</b>                   |                  |                  |                         |                  |                  |                  |
| High                                      | ref              | ref              | ref                     | ref              | ref              | ref              |
| Medium                                    | 1.08 (0.57-2.02) | 0.88 (0.53-1.47) | 0.67 (0.28-1.64)        | 1.20 (0.63-2.30) | 1.02 (0.63-1.67) | 0.86 (0.34-2.16) |
| Low                                       | 1.19 (0.63-2.25) | 1.03 (0.62-1.73) | 1.13 (0.52-2.48)        | 1.21 (0.63-2.34) | 1.10 (0.66-1.81) | 1.39 (0.61-3.14) |
| <b>Oral health and related behaviours</b> |                  |                  |                         |                  |                  |                  |
| <b>Dental insured</b>                     |                  |                  |                         |                  |                  |                  |
| Had                                       |                  | ref              | ref                     |                  | ref              | ref              |
| No                                        |                  | 1.23 (0.78-1.94) | 1.42 (0.63-3.18)        |                  | 1.16 (0.73-1.84) | 1.42 (0.59-3.39) |
| <b>Smoke status</b>                       |                  |                  |                         |                  |                  |                  |
| Never smoked                              |                  | ref              | ref                     |                  | ref              | ref              |
| Used smoker                               |                  | 0.77 (0.50-1.19) | 0.76 (0.39-1.46)        |                  | 0.72 (0.47-1.10) | 0.49 (0.24-1.02) |
| Current smoker                            |                  | 1.33 (0.55-3.22) | 1.17 (0.23-5.94)        |                  | 0.95 (0.42-2.16) | 0.40 (0.05-3.59) |
| <b>Alcohol drinking</b>                   |                  |                  |                         |                  |                  |                  |
| No                                        |                  | ref              | ref                     |                  | ref              | ref              |
| Yes                                       |                  | 1.01 (0.58-1.76) | 0.78 (0.28-2.22)        |                  | 1.03 (0.62-1.70) | 0.89 (0.32-2.50) |
| <b>Oral hygiene (Tooth brushing)</b>      |                  |                  |                         |                  |                  |                  |
| At least twice/day                        |                  | ref              | ref                     |                  | ref              | ref              |

|                                     |                  |                  |     |                  |                  |
|-------------------------------------|------------------|------------------|-----|------------------|------------------|
| Less than twice/day                 | 1.29 90.83-2.01) | 1.40 (0.75-2.61) |     | 1.33 (0.86-2.06) | 1.49 (0.78-2.84) |
| <b>Last dental visiting</b>         |                  |                  |     |                  |                  |
| Less than 12 months                 | ref              | ref              |     | ref              | ref              |
| More than 12 months                 | 1.09 (0.68-1.75) | 1.08 (0.48-2.42) |     | 0.84 (0.52-1.37) | 0.68 (0.28-1.66) |
| <b>Reasons for dental visiting</b>  |                  |                  |     |                  |                  |
| Check                               | ref              | ref              |     | ref              | ref              |
| Problem                             | 0.92 (0.61-1.38) | 0.93 (0.47-1.87) |     | 1.07 (0.70-1.64) | 1.17 (0.58-2.39) |
| <b>General health</b>               |                  |                  |     |                  |                  |
| <b>Asthma</b>                       |                  |                  |     |                  |                  |
| No                                  |                  | ref              |     |                  | ref              |
| Yes                                 |                  | 1.15 (0.46-2.85) |     |                  | 1.46 (0.57-3.75) |
| <b>Arthritis</b>                    |                  |                  |     |                  |                  |
| No                                  |                  | ref              |     |                  | ref              |
| Yes                                 |                  | 0.93 (0.48-1.80) |     |                  | 0.81 (0.41-1.60) |
| <b>Cancer</b>                       |                  |                  |     |                  |                  |
| No                                  |                  | ref              |     |                  | ref              |
| Yes                                 |                  | 1.68 (0.77-3.67) |     |                  | 1.52 (0.66-3.48) |
| <b>Cataracts</b>                    |                  |                  |     |                  |                  |
| No                                  |                  | ref              |     |                  | ref              |
| Yes                                 |                  | 0.91 (0.37-2.22) |     |                  | 0.92 (0.36-2.35) |
| <b>COPD</b>                         |                  |                  |     |                  |                  |
| No                                  |                  | ref              |     |                  | ref              |
| Yes                                 |                  | 1.14 (0.31-4.27) |     |                  | 1.39 (0.36-5.36) |
| <b>Diabetes</b>                     |                  |                  |     |                  |                  |
| No                                  |                  | ref              |     |                  | ref              |
| Yes                                 |                  | 0.55 (0.21-1.44) |     |                  | 0.30 (0.09-1.08) |
| <b>Hypertension</b>                 |                  |                  |     |                  |                  |
| No                                  |                  | ref              |     |                  | ref              |
| Yes                                 |                  | 1.01 (0.53-1.92) |     |                  | 1.28 (0.65-2.53) |
| <b>Heart</b>                        |                  |                  |     |                  |                  |
| No                                  |                  | ref              |     |                  | ref              |
| Yes                                 |                  | 0.49 (0.13-1.92) |     |                  | 1.05 (0.30-3.66) |
| <b>Osteoporosis or hip fracture</b> |                  |                  |     |                  |                  |
| No                                  |                  | ref              | ref | ref              | ref              |
| Yes                                 |                  | 0.84 (0.28-2.49) |     |                  | 0.42 (0.11-1.59) |
| <b>Stroke</b>                       |                  |                  |     |                  |                  |
| No                                  |                  | ref              | ref | ref              | ref              |
| Yes                                 |                  | 1.20 (0.10-13.7) |     |                  | 0.83 (0.07-9.31) |
